# Supplementary material for: Characterization of root response to phosphorus supply from morphology to gene analysis in field-grown wheat
Source: PubMed Central journal article supplement — J Exp Bot. 2013 Feb 4;64(5):1403–11. doi: 10.1093/jxb/ert023 (PMC3598426; doi:10.1093/jxb/ert023), 2013-02-04
Supplement: supp_ert023_jexbot091629_file001.pdf [file supp_ert023_jexbot091629_file001.pdf]

**Table S1** Basic soil properties in 0-30 cm soil layer before the field trials

| Soil property       | Value                   |
|---------------------|-------------------------|
| pH                  | 8.5                     |
| soil organic matter | 10.3 g kg <sup>-1</sup> |
| total N             | 0.67 g kg <sup>-1</sup> |
| Olsen-P             | 7 mg kg <sup>-1</sup>   |
| exchangeable-K      | 74 mg kg <sup>-1</sup>  |

The soil type at the study site is a calcareous alluvial fluvo-aquic soil with a loamy and silt texture. The soil samples were analyzed before fertilization. After fresh soil samples were taken, sieved through a 2 mm sieve in the field and then air-dried in the laboratory. Soil pH value was determined by a pH meter using soil to water ratio of 1:2.5 (Peech, 1965). Total nitrogen was analyzed by semi-micro Kjeldahl digestion (Bremner, 1965) followed by ammonium distillation and titrimetric determinations. Olsen-P was extracted with 0.5 mol L<sup>-1</sup> NaHCO<sub>3</sub> for 30 min, and analyzed colorimetrically according to Murphy and Riley (1962). Exchangeable-K was done by 1 mol L<sup>-1</sup> NH<sub>4</sub>OAc for 30 min and analyzed by flame photometer (Chapman, 1965). Organ carbon (OC) was measured by Walkley and Black wet acid dichromate digestion method (Allison, 1965); soil organic matter was calculated as 1.72 x %OC (Walkley and Black, 1934).

## References

- Peech, HM.** 1965. Hydrogen ion activity. In: Black CA, Evants DD, Ensminger LE, White JL, Clark FE, Dinauer RC, eds. *Methods of soil analysis. Part 2.* Madison, Wisconsin: American Society of Agronomy, 914-926.
- Bremner, JM.** 1965. Total nitrogen. In: Black CA, Evants DD, Ensminger LE, White JL, Clark FE, Dinauer RC, eds. *Methods of soil analysis. Part 2.* Madison, Wisconsin: American Society of Agronomy, 1149-1178.
- Chapman, HD.** 1965. Cation exchange capacity. In: Black CA, Evants DD, Ensminger LE, White JL, Clark FE, Dinauer RC, eds. *Methods of soil analysis. Part 2.* Madison, Wisconsin: American Society of Agronomy, 891-901.
- Allison, E.** 1965. Organic carbom. In: Black CA, Evants DD, Ensminger LE, White JL, Clark FE, Dinauer RC, eds. *Methods of soil analysis. Part 2.* Madison, Wisconsin: American Society of Agronomy, 1367-1378.

**Walkley, A. and Black, IA.** 1934. An examination of the Degtjareff method for determining soil organic matter and proposed modification of chromic titration method. *Soil Science* **37**, 29-38.

**Murphy JR, Riley JP.** 1962. A modified single solution method for the determination of phosphate in natural waters. *Analytica Chimica Acta* **27**, 31-36.

**Table S2** Real time PCR primers

| Gene name               | Forward (5'-3')           | Reverse (5'-3')           |
|-------------------------|---------------------------|---------------------------|
| <i>TaIPS1.1</i>         | TCTCCTGTGAGTACCGGTGACA    | ACTGTACACTAGTCGACAACCTTGC |
| <i>TaPHT1.1&amp;1.9</i> | GAGACCGGCTACTCACGGG       | CTAAGCTT CGATGCCATCGTC    |
| <i>TaPHT1.2</i>         | TGAGACCGGCTACTCACGG       | AATGGAGTCATCGTCGCCAA      |
| <i>TaPHT1.6</i>         | TTTTTTATGGTCGGAGAGCGTT    | CAGCCCTAATTAACCTGGACAACCT |
| <i>TaPHT1.8</i>         | GATCTTCAGGGACATCAAGTGGATC | TGAACCCGAGGAACTGGATGG     |
| <i>TaPHT1.10</i>        | GCGTTCGGGTTCCCTGTATGC     | CAGTCGGAGCAATGGTGTCTGT    |
| <i>TaEXPA6</i>          | GGCGGCCAGTACAAGGTCTT      | GCCCTGAACGAGCGAACTGA      |
| <i>TaEXPB8</i>          | CCGGACAATGCTTACTGGTCCA    | TGAACAATAGGTAGCGTTTGGTGAG |
| <i>TaPAP15</i>          | GAAGTTTTGCTGGGAACGACA     | GCAATAGGCACTTATCGGGTTC    |
| <i>TaPAP16</i>          | GTTCGGAAAGTCCACCAATATGC   | GACACTAACATGAGCCAAACTCAAA |
| <i>TaRNS1</i>           | AGTTCCTCCGACCTTCTGATGCG   | AACAATCGGCTCCCTCCACAT     |
| <i>TaActin</i>          | ACCTTCAGTTGCCAGCAAT       | CAGAGTCGAGCACAATACCAGTTG  |

**Fig. S1**

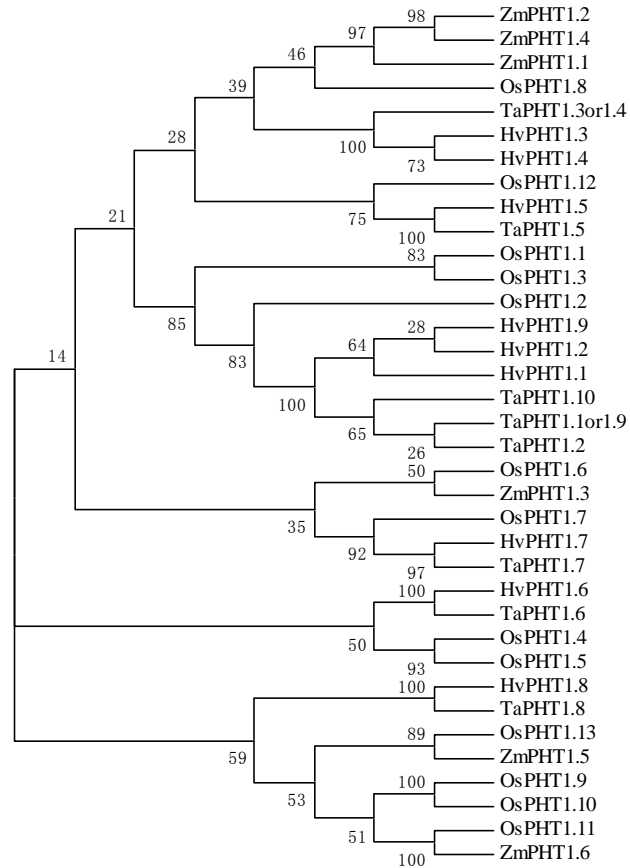

**Fig. S1** Phylogenetic analysis of PHT1 proteins from wheat, barley, rice and maize. Phylogenetic tree of 8 TaPHT1 genes, 9 HvPHT1 genes, 13 OsPHT1 genes, and 6 ZmPHT1 genes was constructed by the neighbor-joining method with 1000 bootstrap replicates in the MEGA5 program.

The protein ID numbers of the PHT1 genes are barley (*Hordeum vulgare*) HvPHT1.1, AAN37900; HvPHT1.2, AAO72434; HvPHT1.3, AAO72439; HvPHT1.4, AAO72438; HvPHT1.5, AAO72435; HvPHT1.6, AAN37901; HvPHT1.7, AAO07436; HvPHT1.8, AAO72440; HvPHT1.9, CAP17759; rice (*Oryza sativa*) OsPHT1.1, AAN39042; OsPHT1.2, AAN39043; OsPHT1.3, AAN39044; OsPHT1.4, AAN39045; OsPHT1.5, AAN39046; OsPHT1.6, AAN39047; OsPHT1.7, AAN39048; OsPHT1.8, AAN39049; OsPHT1.9, AAN39050; OsPHT1.10, AAN39051; OsPHT1.11, AAN39052; OsPHT1.12, AAN87745; OsPHT1.13, AAN39054; and maize (*Zea mays*) ZmPHT1.1, AAY42385; ZmPHT1.2, AAY42386; ZmPHT1.3, AAY42387; ZmPHT1.4, AAY42388; ZmPHT1.5, AAY42389; ZmPHT1.6, AAY42390. Protein sequences of TaPHT1s were not published.
